# Supplementary material for: Extensive Genome Exploration of Clostridium botulinum Group III Field Strains
Source: MDPI journal article supplement (doi:10.3390/microorganisms9112347), 2021-11-13
Supplement: s1 [file s1]

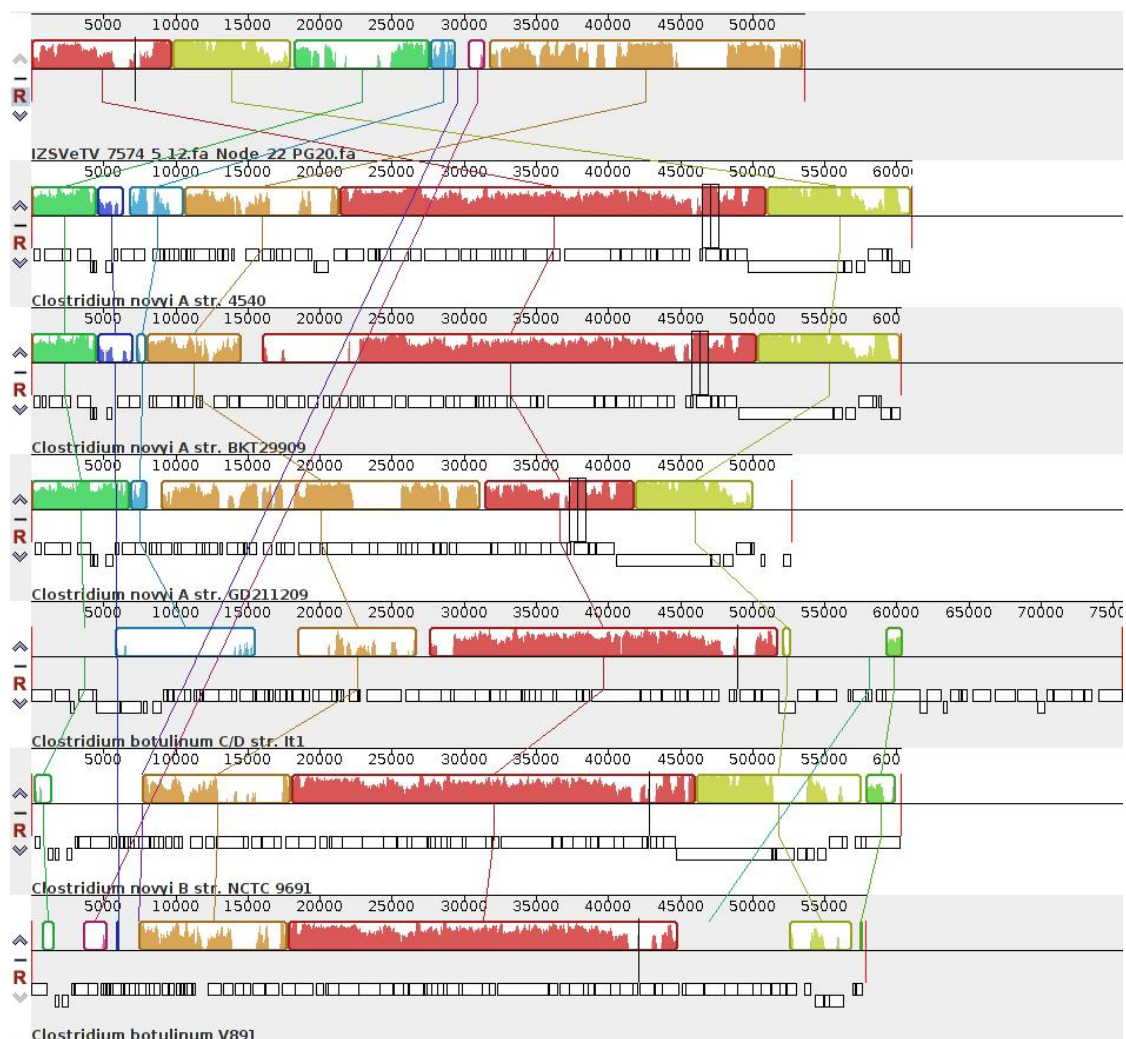

**Figure S1.** Graphical representation of the alignment between sequences of plasmid categories PG10 and PG20.

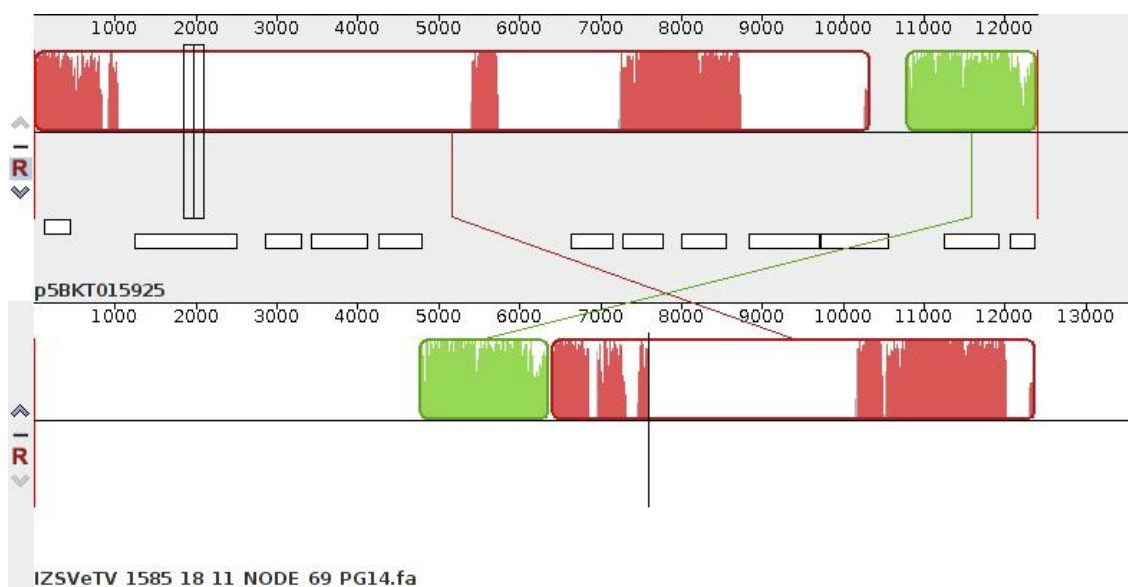

**Figure S2.** Graphical representation of the alignment between sequences of plasmid categories PG7 and PG14.
